# Supplementary material for: Changing optical properties of black carbon and brown carbon aerosols during long-range transport from the Indo-Gangetic Plain to the equatorial Indian Ocean
Source: Copernicus journal article supplement (doi:10.5194/acp-24-11911-2024), 2024-10-24
Supplement: Supplementary file 1 [file acp-24-11911-2024-supplement.pdf]

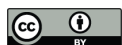

*Supplement of*

## **Changing optical properties of black carbon and brown carbon aerosols during long-range transport from the Indo-Gangetic Plain to the equatorial Indian Ocean**

**Krishnakant Budhavant et al.**

*Correspondence to:* Örjan Gustafsson ([orjan.gustafsson@aces.su.se](mailto:orjan.gustafsson@aces.su.se))

The copyright of individual parts of the supplement might differ from the article licence.

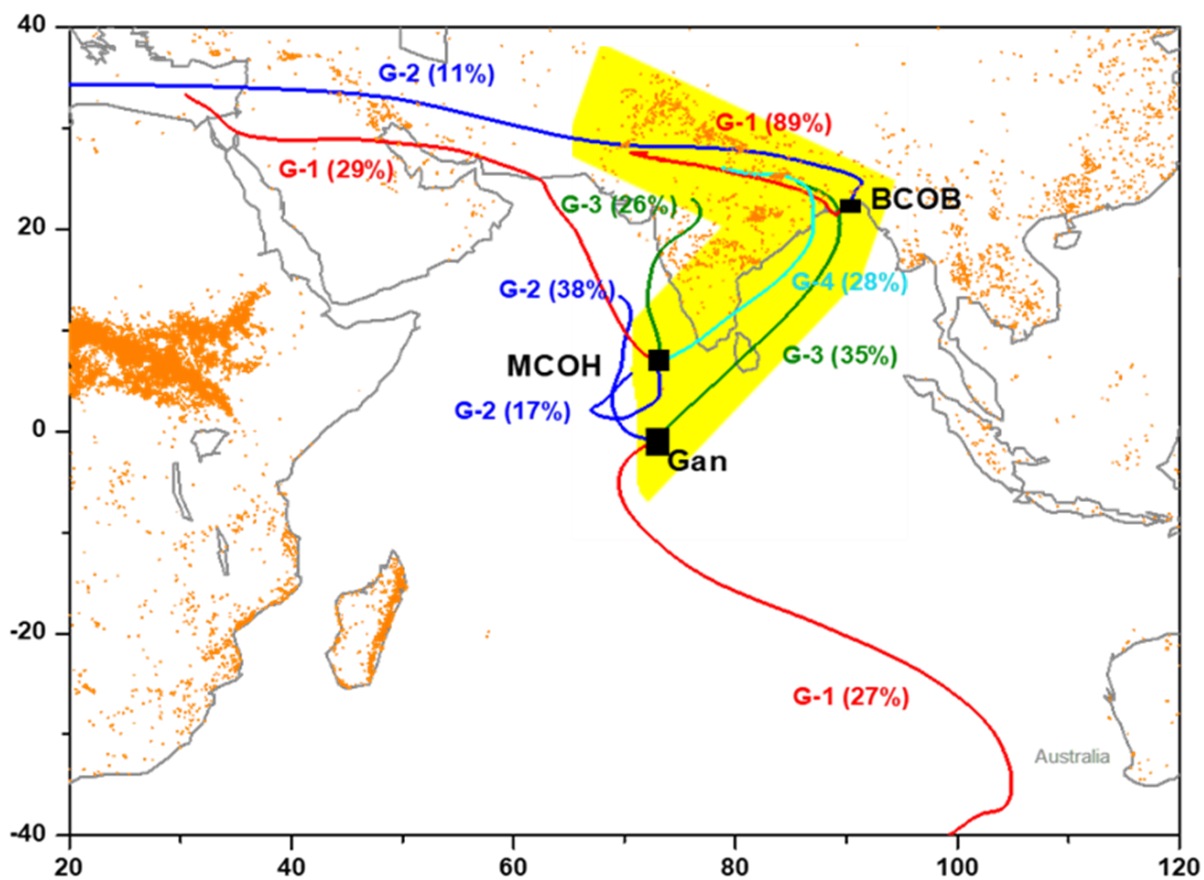

15 Figure S1: The 10-day air mass back trajectory cluster means ending at Bhola Climate Observatory-Bangladesh  
 (BCOB), Maldives Climate Observatory at Hanimaadhoo (MCOH), and Maldives Climate Observatory at Gan  
 (MCOG), at 50 m above mean sea level with MODIS/Aqua active fires from December 2017 to March 2018. G-  
 20 represents the group number and percentage in brackets and gives information on percentages of trajectories  
 in the group.

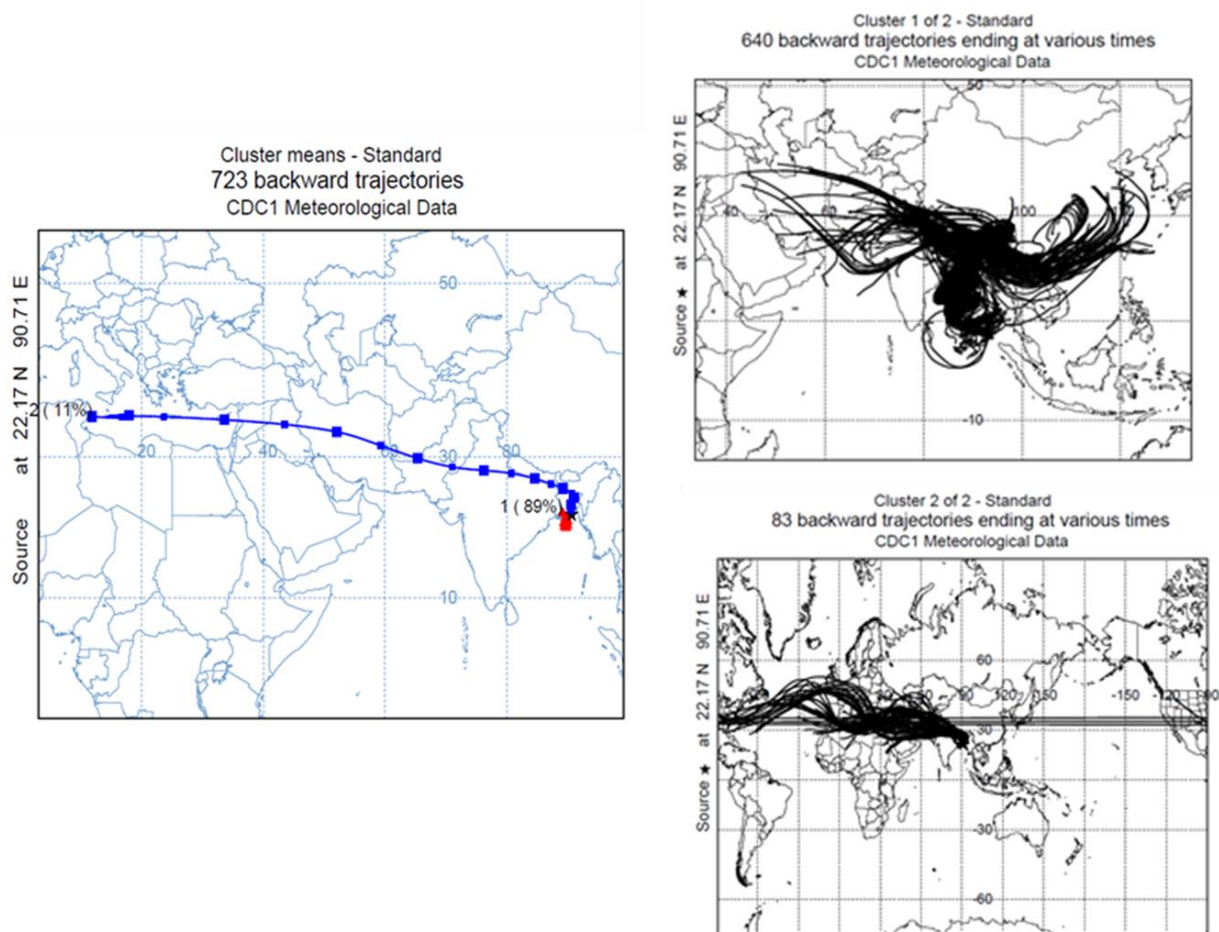

**Figure S2:** Ten-day air mass back-trajectories (AMBTs) were generated for Bhola Climate Observatory-Bangladesh (BCOB) at an arrival height of 50 m, computed for every three h using NOAA Hybrid Single-Particle Lagrangian Integrated Trajectory Model (HYSPLIT) version 4.

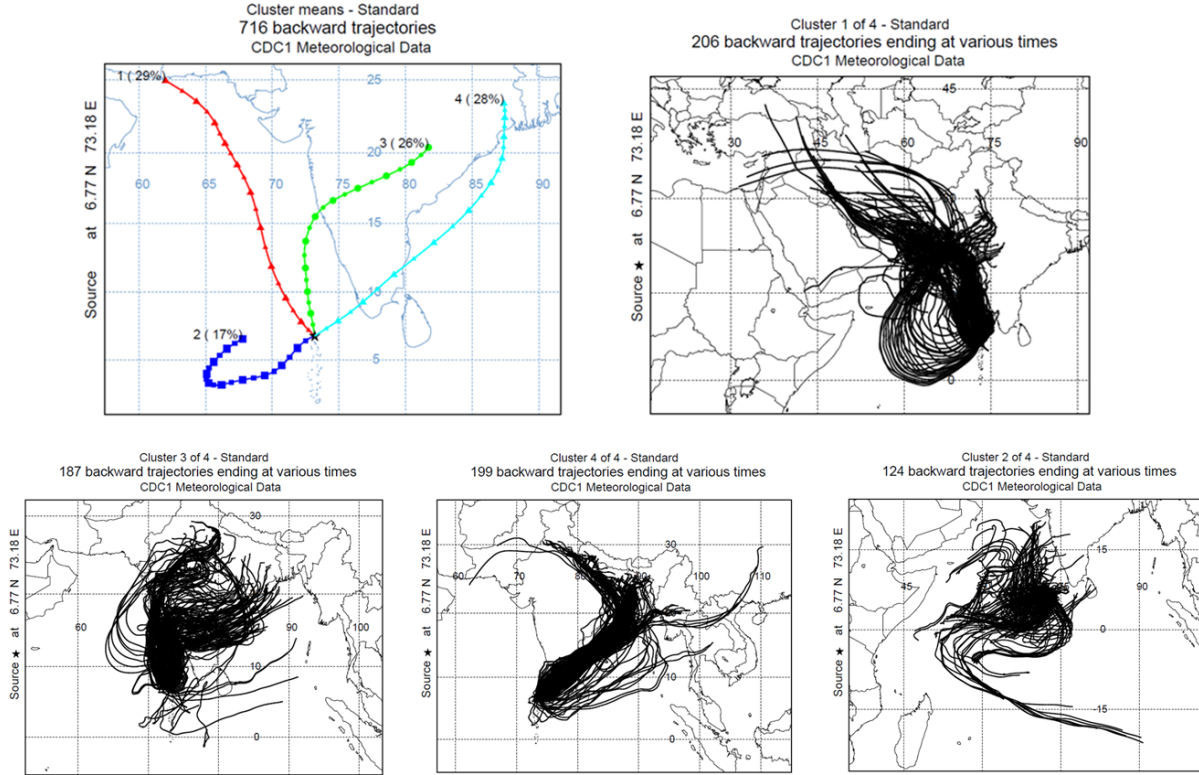

25

**Figure S3: Ten-day air mass back-trajectories (AMBTs) were generated for Maldives Climate Observatory-Hanimaadhoo (MCOH) at an arrival height of 50 m, computed for every three hours using NOAA HYSPLIT model version 4. The AMBTs were clustered into four regions: Western Indian margin, Southern India, IGP, and the Arabian Sea.**

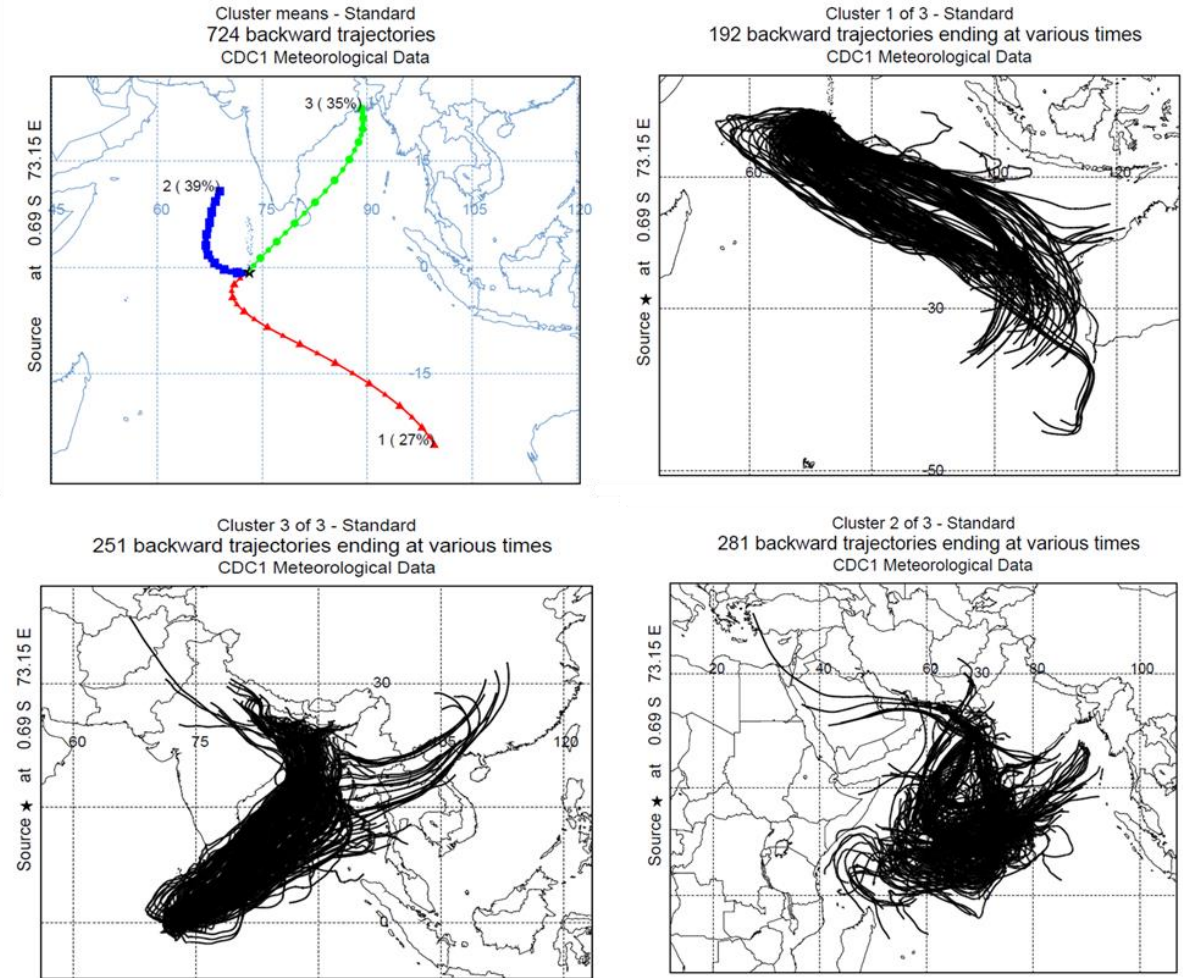

30

**Figure S4:** Ten-day air mass back-trajectories (AMBTs) were generated for Maldives Climate Observatory-Gan (MCOG) at an arrival height of 50 m, computed for every three h using NOAA HYSPLIT model version 4. The AMBTs were clustered into four regions: Arabian Sea, IGP, and Indian Ocean.

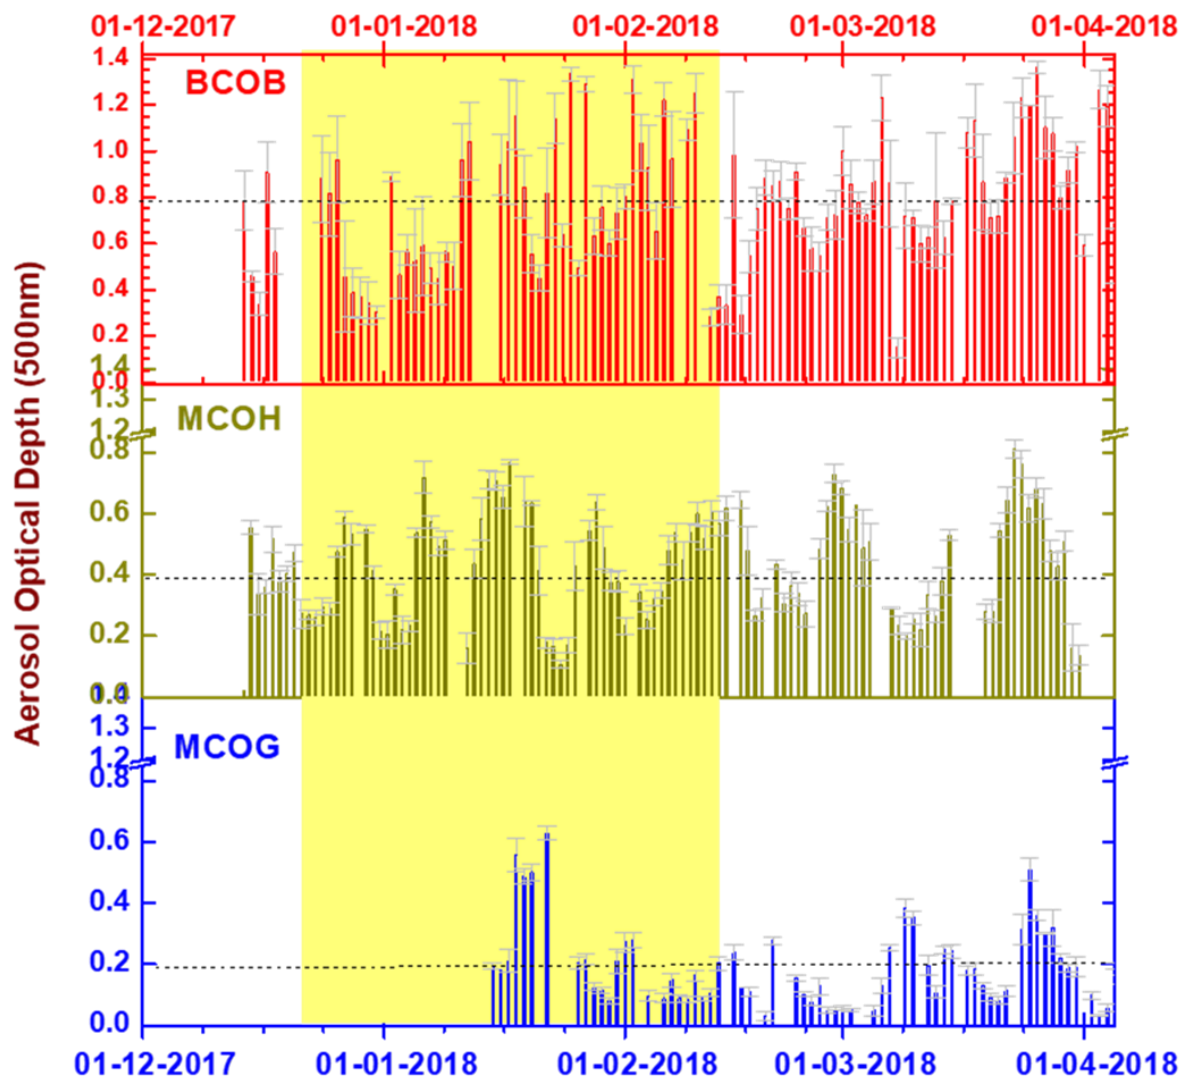

35 Figure S5. Daily average aerosol optical depth (AOD) measured over Bhola Climate Observatory-Bangladesh (BCOB), Maldives Climate Observatory-Hanimaadhoo (MCOH), and Maldives Climate Observatory-Gan (MCOG) from December 2017 to April 2018. The vertical yellow field indicates the period dominated by air mass transport through the high-pollution source region Indo-Gangetic Plain (IGP).

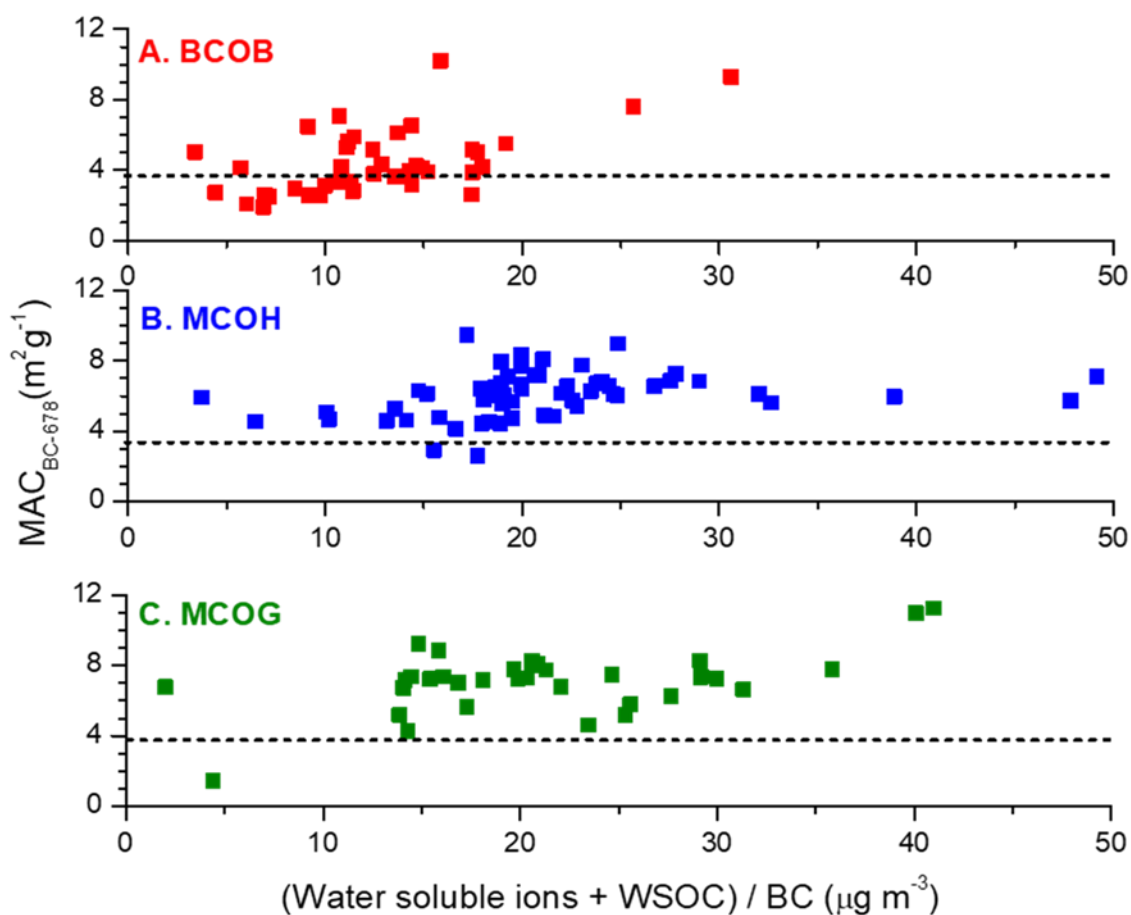

40 **Figure S6: The ratio of black carbon (BC) MAC to [(water-soluble ions + WSOC) / BC ] measured at Bhola Climate Observatory-Bangladesh (BCOB), Maldives Climate Observatory-Hanimaadhoo (MCOH), and Maldives Climate Observatory-Gan (MCOG) from December 2017 to April 2018. The horizontal black dotted lines indicate the average MAC (3.5 m<sup>2</sup> g<sup>-1</sup>) measured at the BCOB period when air mass transport dominated through the high-pollution source region Indo-Gangetic Plain (IGP).**

45 **Table S1. Matrix of correlation coefficients (r) for the components measured at BCOB station. Correlations coefficients higher than 0.7 are highlighted in bold.**

|                     | OC          | EC          | WSOC        | WIOC        | nss-SO <sub>4</sub> | NO <sub>3</sub> | nss-K       | nss-Ca      | nss-Mg      | NH <sub>4</sub> | Na          | Cl          |
|---------------------|-------------|-------------|-------------|-------------|---------------------|-----------------|-------------|-------------|-------------|-----------------|-------------|-------------|
| OC                  | <b>1.00</b> | <b>0.85</b> | <b>0.95</b> | <b>0.99</b> | 0.11                | <b>0.80</b>     | <b>0.85</b> | -0.36       | -0.44       | -0.23           | 0.22        | <b>0.76</b> |
| EC                  | <b>0.85</b> | <b>1.00</b> | <b>0.79</b> | <b>0.85</b> | -0.05               | 0.55            | <b>0.79</b> | -0.46       | -0.54       | -0.22           | 0.08        | <b>0.74</b> |
| WSOC                | <b>0.95</b> | <b>0.79</b> | <b>1.00</b> | <b>0.89</b> | 0.10                | <b>0.76</b>     | <b>0.78</b> | -0.41       | -0.47       | -0.19           | 0.17        | <b>0.69</b> |
| WIOC                | <b>0.99</b> | <b>0.85</b> | <b>0.89</b> | <b>1.00</b> | 0.11                | <b>0.78</b>     | <b>0.85</b> | -0.32       | -0.42       | -0.24           | 0.23        | <b>0.77</b> |
| nss-SO <sub>4</sub> | 0.11        | -0.05       | 0.10        | 0.11        | <b>1.00</b>         | 0.40            | 0.28        | 0.21        | 0.09        | -0.03           | 0.14        | 0.22        |
| NO <sub>3</sub>     | <b>0.80</b> | 0.55        | <b>0.76</b> | <b>0.78</b> | 0.40                | <b>1.00</b>     | <b>0.77</b> | -0.12       | -0.23       | -0.28           | 0.35        | <b>0.73</b> |
| nss-K               | <b>0.85</b> | <b>0.79</b> | <b>0.78</b> | <b>0.85</b> | 0.28                | <b>0.77</b>     | <b>1.00</b> | -0.38       | -0.43       | -0.27           | 0.30        | <b>0.82</b> |
| nss-Ca              | -0.36       | -0.46       | -0.41       | -0.32       | 0.21                | -0.12           | -0.38       | <b>1.00</b> | 0.53        | 0.40            | 0.17        | -0.14       |
| nss-Mg              | -0.44       | -0.54       | -0.47       | -0.42       | 0.09                | -0.23           | -0.43       | 0.53        | <b>1.00</b> | 0.05            | 0.63        | -0.20       |
| NH <sub>4</sub>     | -0.23       | -0.22       | -0.19       | -0.24       | -0.03               | -0.28           | -0.27       | 0.40        | 0.05        | <b>1.00</b>     | -0.17       | -0.27       |
| Na                  | 0.22        | 0.08        | 0.17        | 0.23        | 0.14                | 0.35            | 0.30        | 0.17        | 0.63        | -0.17           | <b>1.00</b> | 0.46        |
| Cl                  | <b>0.76</b> | <b>0.74</b> | <b>0.68</b> | <b>0.77</b> | 0.22                | <b>0.73</b>     | <b>0.82</b> | -0.14       | -0.20       | -0.27           | 0.46        | <b>1.00</b> |



50 Table S2. Matrix of correlation coefficients (r) for the components in PM<sub>2.5</sub> measured at MCOH. Correlations coefficients higher than 0.7 are highlighted in bold.

|                     | OC          | EC          | WSOC        | WIOC        | nss-SO <sub>4</sub> | NO <sub>3</sub> | nss-K       | nss-Ca      | nss-Mg      | NH <sub>4</sub> | Na          | Cl          |
|---------------------|-------------|-------------|-------------|-------------|---------------------|-----------------|-------------|-------------|-------------|-----------------|-------------|-------------|
| OC                  | <b>1.00</b> | <b>0.74</b> | <b>0.72</b> | <b>0.93</b> | 0.60                | 0.21            | 0.55        | 0.33        | -0.13       | 0.60            | 0.27        | 0.11        |
| EC                  | <b>0.74</b> | <b>1.00</b> | 0.61        | 0.64        | <b>0.78</b>         | 0.40            | <b>0.74</b> | 0.25        | 0.04        | <b>0.78</b>     | 0.67        | 0.47        |
| WSOC                | <b>0.72</b> | 0.61        | <b>1.00</b> | 0.60        | <b>0.82</b>         | 0.32            | <b>0.77</b> | 0.29        | -0.08       | <b>0.83</b>     | 0.58        | 0.52        |
| WIOC                | <b>0.93</b> | 0.64        | 0.60        | <b>1.00</b> | 0.48                | -0.01           | 0.46        | 0.32        | -0.04       | 0.49            | 0.67        | 0.50        |
| nss-SO <sub>4</sub> | 0.60        | <b>0.78</b> | <b>0.82</b> | 0.48        | <b>1.00</b>         | 0.38            | <b>0.94</b> | 0.21        | 0.05        | <b>0.99</b>     | <b>0.72</b> | <b>0.76</b> |
| NO <sub>3</sub>     | 0.21        | 0.40        | 0.32        | -0.01       | 0.38                | <b>1.00</b>     | 0.32        | 0.12        | 0.01        | 0.38            | <b>0.84</b> | <b>0.80</b> |
| nss-K               | 0.55        | <b>0.74</b> | <b>0.77</b> | 0.46        | <b>0.94</b>         | 0.32            | <b>1.00</b> | 0.15        | 0.08        | <b>0.95</b>     | <b>0.70</b> | 0.59        |
| nss-Ca              | 0.33        | 0.25        | 0.29        | 0.32        | 0.21                | 0.12            | 0.15        | <b>1.00</b> | 0.23        | 0.19            | 0.10        | -0.20       |
| nss-Mg              | -0.13       | 0.04        | -0.08       | -0.04       | 0.05                | 0.01            | 0.08        | 0.23        | <b>1.00</b> | 0.05            | -0.04       | -0.47       |
| NH <sub>4</sub>     | 0.60        | <b>0.78</b> | <b>0.83</b> | 0.49        | <b>0.99</b>         | 0.38            | <b>0.95</b> | 0.19        | 0.05        | <b>1.00</b>     | <b>0.72</b> | 0.49        |
| Na                  | 0.27        | 0.67        | 0.58        | 0.67        | <b>0.72</b>         | <b>0.84</b>     | <b>0.70</b> | 0.10        | -0.04       | <b>0.72</b>     | <b>1.00</b> | 0.59        |
| Cl                  | 0.11        | 0.47        | 0.52        | 0.50        | <b>0.76</b>         | <b>0.80</b>     | 0.59        | -0.20       | -0.47       | 0.49            | 0.59        | <b>1.00</b> |

**Table S3. Matrix of correlation coefficients (r) for the components measured at MCOG station. Correlations coefficients higher than 0.7 are highlighted in bold.**

|                           | OC          | EC          | WSOC        | WIOC        | nss-SO <sub>4</sub> | NO <sub>3</sub> | nss-K       | nss-Ca      | nss-Mg      | NH <sub>4</sub> | Na          | Cl          |
|---------------------------|-------------|-------------|-------------|-------------|---------------------|-----------------|-------------|-------------|-------------|-----------------|-------------|-------------|
| <b>OC</b>                 | 1.00        | <b>0.83</b> | <b>0.80</b> | <b>0.99</b> | 0.55                | <b>0.68</b>     | 0.26        | 0.56        | 0.39        | 0.43            | 0.53        | 0.48        |
| <b>EC</b>                 | <b>0.83</b> | <b>1.00</b> | <b>0.67</b> | <b>0.83</b> | <b>0.79</b>         | 0.50            | 0.10        | 0.39        | 0.27        | 0.63            | 0.53        | 0.35        |
| <b>WSOC</b>               | <b>0.80</b> | <b>0.67</b> | <b>1.00</b> | <b>0.73</b> | 0.50                | 0.53            | 0.02        | 0.44        | 0.26        | 0.43            | 0.43        | 0.38        |
| <b>WIOC</b>               | <b>0.99</b> | <b>0.83</b> | <b>0.73</b> | <b>1.00</b> | 0.53                | <b>0.68</b>     | 0.30        | 0.56        | 0.39        | 0.41            | 0.52        | 0.47        |
| <b>nss-SO<sub>4</sub></b> | 0.55        | <b>0.79</b> | 0.50        | 0.53        | <b>1.00</b>         | 0.30            | 0.17        | 0.29        | 0.22        | <b>0.78</b>     | 0.54        | 0.04        |
| <b>NO<sub>3</sub></b>     | <b>0.68</b> | 0.50        | 0.53        | <b>0.68</b> | 0.30                | <b>1.00</b>     | 0.24        | <b>0.92</b> | <b>0.85</b> | 0.00            | <b>0.74</b> | <b>0.80</b> |
| <b>nss-K</b>              | 0.26        | 0.10        | 0.02        | 0.30        | 0.17                | 0.24            | <b>1.00</b> | 0.31        | 0.47        | 0.24            | 0.04        | 0.14        |
| <b>nss-Ca</b>             | 0.56        | 0.39        | 0.44        | 0.56        | 0.29                | <b>0.92</b>     | 0.31        | <b>1.00</b> | 0.91        | 0.04            | 0.68        | <b>0.70</b> |
| <b>nss-Mg</b>             | 0.39        | 0.27        | 0.26        | 0.39        | 0.22                | <b>0.85</b>     | 0.47        | 0.91        | <b>1.00</b> | -0.04           | 0.62        | <b>0.74</b> |
| <b>NH<sub>4</sub></b>     | 0.43        | 0.63        | 0.43        | 0.41        | <b>0.78</b>         | 0.00            | 0.24        | 0.04        | -0.04       | <b>1.00</b>     | -0.02       | -0.23       |
| <b>Na</b>                 | 0.53        | 0.53        | 0.43        | 0.52        | 0.54                | <b>0.74</b>     | 0.04        | 0.68        | 0.62        | -0.02           | <b>1.00</b> | 0.68        |
| <b>Cl</b>                 | 0.48        | 0.35        | 0.38        | 0.47        | 0.04                | <b>0.80</b>     | 0.14        | <b>0.70</b> | <b>0.74</b> | -0.23           | 0.68        | <b>1.00</b> |

55

**Table S4. Monthly average concentrations of black carbon (BC), organic carbon (OC), and major ions ( $\mu\text{g m}^{-3}$ ) were measured at the Bhola Climate Observatory-Bangladesh (BCOB), Maldives Climate Observatory-Hanimaadhoo (MCOH), Maldives Climate Observatory-Gan (MCOG) from November 2017 to March 2018.**

| Site                 | OC       | EC      | Na <sup>+</sup> | Cl <sup>-</sup> | NO <sub>3</sub> <sup>-</sup> | NH <sub>4</sub> <sup>+</sup> | nss-SO <sub>4</sub> <sup>2-</sup> | nss-K <sup>+</sup> |
|----------------------|----------|---------|-----------------|-----------------|------------------------------|------------------------------|-----------------------------------|--------------------|
| <b>November-2017</b> |          |         |                 |                 |                              |                              |                                   |                    |
| <b>BCOB</b>          | 24.4±11  | 3.3±1.0 | 0.3±0.2         | 1.9±1.1         | 9.9±7.2                      | 3.3±4.0                      | 10.0±5.1                          | 3.1±1.2            |
| <b>MCOH</b>          | 0.4±0.1  | 0.2±0.1 | 0.5±0.2         | 0.1±0.0         | 0.1±0.1                      | 3.4±0.2                      | 12.5±0.7                          | 0.4±0.1            |
| <b>MCOG</b>          | 0.7±0.2  | 0.2±0.1 | 2.1±0.5         | 3.2±0.8         | 1.7±1.0                      | 0.0±0.0                      | 2.0±1.0                           | 0.6±0.2            |
| <b>December 2017</b> |          |         |                 |                 |                              |                              |                                   |                    |
| <b>BCOB</b>          | 23.6±8.1 | 3.8±1.4 | 0.4±0.2         | 2.2±1.5         | 5.9±3.5                      | 2.8±2.3                      | 7.9±3.4                           | 2.7±1.1            |
| <b>MCOH</b>          | 2.8±1.8  | 0.9±0.4 | 0.9±0.4         | 0.1±0.1         | 0.1±0.0                      | 3.5±1.8                      | 12.9±6.0                          | 0.3±0.2            |
| <b>MCOG</b>          | 0.9±0.7  | 0.3±0.2 | 0.4±0.4         | 0.6±0.6         | 0.2±0.3                      | 0.5±0.5                      | 1.8±1.7                           | 0.1±0.1            |
| <b>January 2018</b>  |          |         |                 |                 |                              |                              |                                   |                    |
| <b>BCOB</b>          | 32.2±4.4 | 3.8±0.4 | 0.6±0.4         | 3.9±1.8         | 16.5±7.4                     | 1.8±1.8                      | 13.7±4.7                          | 3.3±1.0            |
| <b>MCOH</b>          | 2.7±1.5  | 1.1±0.6 | 1.1±0.6         | 0.2±0.2         | 0.1±0.0                      | 5.2±4.5                      | 16.1±7.7                          | 0.5±0.4            |
| <b>MCOG</b>          | 1.2±0.5  | 0.7±0.2 | 1.5±1.4         | 0.6±0.3         | 0.4±0.4                      | 1.8±1.0                      | 8.3±3.9                           | 0.2±0.1            |
| <b>February 2018</b> |          |         |                 |                 |                              |                              |                                   |                    |
| <b>BCOB</b>          | 12.7±5.8 | 2.1±0.7 | 0.4±0.4         | 0.5±0.5         | 4.7±4.7                      | 6.1±1.8                      | 12.5±4.1                          | 1.5±0.6            |
| <b>MCOH</b>          | 2.4±1.1  | 1.2±0.4 | 0.8±0.4         | 0.1±0.2         | 0.1±0.0                      | 4.5±1.6                      | 16.7±5.7                          | 0.5±0.2            |
| <b>MCOG</b>          | 0.8±0.3  | 0.4±0.2 | 1.7±0.7         | 0.4±0.3         | 0.4±0.3                      | 0.1±0.0                      | 3.4±1.7                           | 0.1±0.1            |
| <b>March 2018</b>    |          |         |                 |                 |                              |                              |                                   |                    |
| <b>BCOB</b>          | 11.3±8.4 | 2.3±1.0 | 0.3±0.1         | 1.4±1.5         | 3.6±4.0                      | 7.0±2.1                      | 13.5±2.3                          | 1.8±0.8            |
| <b>MCOH</b>          | 1.4±0.9  | 0.9±0.5 | 0.5±0.4         | 0.1±0.2         | 0.1±0.0                      | 3.5±2.6                      | 12.2±9.6                          | 0.4±0.4            |
| <b>MCOG</b>          | 0.2±0.2  | 0.1±0.0 | 0.6±0.5         | 0.5±0.5         | 0.1±0.1                      | 0.1±0.2                      | 1.0±0.8                           | 0.0±0.0            |
